# Supplementary material for: The Roman Houses of the Caelian Hill (Rome, Italy): Multitemporal Evaluation of Biodeterioration Patterns
Source: MDPI journal article supplement (doi:10.3390/microorganisms11071770), 2023-07-06
Supplement: s1 [file s1]

## Supplementary material

### The Roman houses of the Caelian Hill (Rome, Italy): Multitemporal evaluation of biodeterioration patterns

Table S1. PCR amplification programs applied for the targeted regions. The last line reports the cycling repeats.

| 27f         | Cya106f     | ITS5        | rbcLaF      | ChloroF     |
|-------------|-------------|-------------|-------------|-------------|
| 1492r       | Cya781r     | ITS4        | rbcLr590    | ChloroR     |
| 95° C x 2'  | 95° C x 2'  | 95 °C x 3'  | 95 °C x 2'  | 94 °C x 3'  |
| 95 °C x 30" | 95 °C x 45" | 95 °C x 30" | 95 °C x 30" | 94 °C x 1'  |
| 50 °C x 30" | 55 °C x 30" | 55 °C x 30" | 50 °C x 90" | 59 °C x 1'  |
| 72 °C x 2'  | 72 °C x 1'  | 72 °C x 32" | 72 °C x 40" | 72 °C x 1'  |
| 72 °C x 7'  | 72 °C x 5'  | 72 °C x 5'  | 72 °C x 5'  | 72 °C x 10' |
| 30x         | 40x         | 35 x        | 45x         | 35 x        |

Table S2 Environmental conditions recorded during the two sampling sessions.

|                  | outdoor  |      | CG       |      | NP       |      | W       |      | BAL     |      | outdoor |     |
|------------------|----------|------|----------|------|----------|------|---------|------|---------|------|---------|-----|
|                  | °C       | RH%  | °C       | RH%  | °C       | RH%  | °C      | RH%  | °C      | RH%  | °C      | RH% |
| July             | 26.3     | 61.5 | 23.3     | 76.4 | 22.5     | 81.3 | 20.3    | 88.3 | 17.7    | 88.6 | 31.05   | 54  |
| Nov              | 18       | 72   | 19.2     | 68.4 | 19.4     | 83.9 | 19      | 85   | 17.5    | 87.6 | 16.8    | 81  |
| hour             | 10:00 AM |      | 10:15 AM |      | 11:50 AM |      | 1:20 PM |      | 2:35 PM |      | 3:15 PM |     |
| Nov 5th,<br>2002 | 15.1     | 51   | 18.9     | 80   | 19.3     | 90   | 20      | 92   | 18.3    | 93   |         |     |

Outdoor refers to the external conditions recorded in *Clivus Scauri* street just close the entrance door before and after the sampling sessions. CG, Chamber of the Geniuses; NP, Nymphaeum of Proserpine; W, winery; BAL, *Balneum*

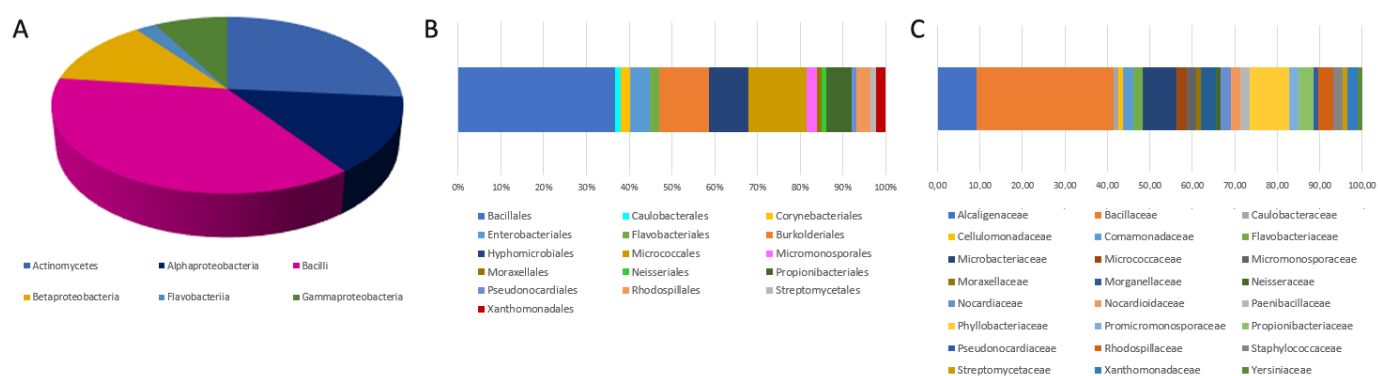

Figure S1. Bacterial isolates frequency at (A) class, (B) order and (C) family level.
